# Supplementary material for: Ultrasound-guided left heart injection: a safer and more efficient strategyfor mouse thoracic aortic gene delivery
Source: Research Square preprint supplement (doi:10.21203/rs.3.rs-7412569/v1), 2025-09-03
Supplement: Supplementary file 1 [file ce137b39af9653a077da5556.xlsx]

## Sheet: Sheet1
Group	Length（4w,cm）	Length（8w,cm）	Weight（4w,g）	Weight（8w,g）	Weight of heart(8w,g)
NC1	13.2	15	15.3	22.2	0.123
NC2	14.2	16.5	16.4	23.7	0.124
NC3	14.3	16.8	16.7	24.7	0.125
NC4	13.1	15.5	15.8	21.1	0.137
NC5	14.5	16.2	16.7	24.3	0.125
NC6	14.4	16.1	16.2	22.9	0.134
NC7	14.9	17.1	17.5	26.5	0.149
NC8	13.3	15.5	16.2	23	0.126
NC9	13.7	16	15.8	23.6	0.133
NC10	14.2	16.8	16	24.1	0.138
NC11	12.9	15.2	15.1	23.2	0.13
NC12	13.5	16.1	15.6	23.3	0.132
NC13	13.7	15.8	16.5	23.8	0.138
NC14	14	15.9	16.2	23.5	0.129
NC15	14.3	16.6	16.9	23.9	0.133
TI1	13.3	15.4	15.4	22.6	0.126
TI2	13.6	15.5	15.9	23.1	0.132
TI3	13.2	15.3	15.1	22.3	0.124
TI4	14.1	15.8	16.3	23.7	0.133
TI5	14.3	16.7	16.6	24.1	0.141
TI6	13.1	15.3	15	21.9	0.121
TI7	14.3	16.1	16.5	24.1	0.133
TI8	12.8	14.9	14.5	21.6	0.12
TI9	13.2	15.3	15.3	22.7	0.129
TI10	13.9	16.2	16.1	23.8	0.131
TI11	14.1	16.6	16.2	23.9	0.133
TI12	13.7	16	15.6	23.6	0.135
TI13	13.2	15.6	15.5	23.2	0.128
TI14	13.5	15.7	15.9	23.7	0.132
TI15	14.1	16.2	16.1	23.8	0.138
TLI1	13.5	15.6	15.7	22.9	0.131
TLI2	13.3	15.5	15.6	22.9	0.127
TLI3	14.5	16.8	16.9	24.5	0.135
TLI4	13.7	15.8	16.1	23.1	0.127
TLI5	13.5	15.6	15.7	23.7	0.129
TLI6	14.1	15.7	15.8	22.9	0.132
TLI7	14.2	16.4	16.8	23.5	0.134
TLI8	13.5	15.8	16.3	23.5	0.131
TLI9	13.2	16	15.5	23.4	0.129
TLI10	14.4	16.7	16.2	24	0.135
TLI11	13.2	15.5	15.6	23.2	0.133
TLI12	13.6	16	15.8	23.5	0.135
TLI13	13.3	15.2	16.1	22.8	0.125
TLI14	14.2	16.1	16.3	23.8	0.133
TLI15	14.4	16.3	16.5	23.7	0.138
ULI1	13.5	15.7	15.8	21.1	0.126
ULI2	13.3	15.5	15.6	22.8	0.129
ULI3	13.8	15.9	15.9	22.8	0.122
ULI4	14.1	15.8	16.3	23.7	0.133
ULI5	14.5	16.7	16.9	24.4	0.144
ULI6	13.7	15.9	16.2	23.1	0.132
ULI7	14.1	15.8	16.1	23.8	0.138
ULI8	13.1	15.1	15.2	22.6	0.128
ULI9	13.6	15.8	15.9	23.1	0.132
ULI10	13.4	15.7	15.9	23.9	0.138
ULI11	14.4	16.4	16.3	23.7	0.132
ULI12	13.1	15	15.3	22.9	0.124
ULI13	13.6	15.7	15.8	23.5	0.129
ULI14	13.9	15.7	15.8	23.8	0.136
ULI15	14.5	16.4	16.5	24.1	0.142
